# Supplementary material
Source: Springer Nature journal article supplement (https://www.springermedizin.de/resource/supplementary/12936_2013_2825_MOESM14_ESM.pdf/9544206)

Proportion of households that are targeted (blue) or untargeted:

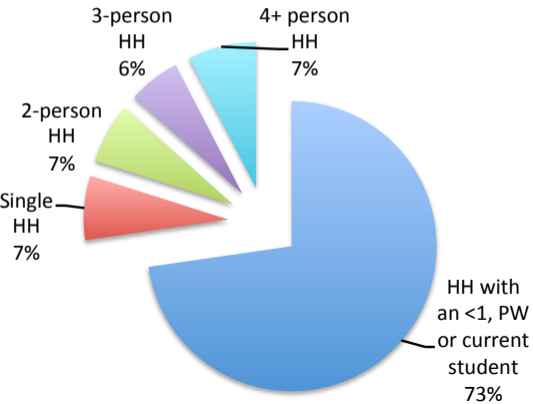

Proportion of population living in households that are targeted (blue) or untargeted:

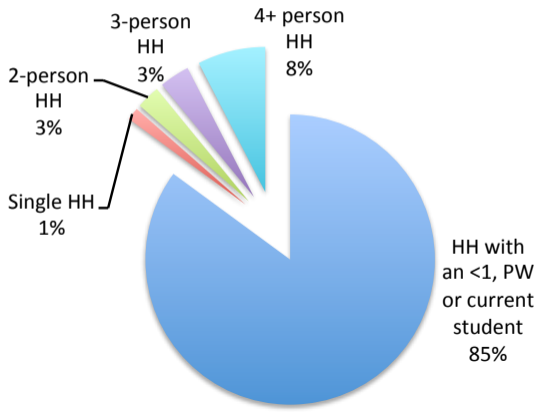

Supplement: MOESM14 [file 9544206]
